# Supplementary material for: Virgin Olive Oil Ranks First in a New Nutritional Quality Score Due to Its Compositional Profile
Source: MDPI journal article supplement (doi:10.3390/nu15092127), 2023-04-28
Supplement: s1 [file s1]

**Supplementary Table S2.** Lowest, highest and mean content of trans fatty acids, tocopherols and sterols as criteria for the developing of the nutritional quality score of dietary oils.

| Oil                                    | TFA    |         |      | Tocopherols |         |       | Phytosterols |         |      |
|----------------------------------------|--------|---------|------|-------------|---------|-------|--------------|---------|------|
|                                        | Lowest | Highest | Mean | Lowest      | Highest | Mean  | Lowest       | Highest | Mean |
| <b>Almond</b> [2-4,65]                 | 0.0    | 0.0     | 0.0  | 0.0         | 119.8   | 59.9  | 47           | 455     | 251  |
| <b>Argan</b> [5-6]                     | 0.0    | 0.1     | 0.1  | 60.0        | 90.0    | 75.0  | 180          | 295     | 238  |
| <b>Avocado</b> [3,12]                  | 0.0    | 0.0     | 0.0  | 0.0         | 14.9    | 7.5   | 76           | 434     | 255  |
| <b>Beef tallow</b> [10]                | 0.0    | 0.0     | 0.0  | 2.7         | 2.7     | 2.7   | 0            | 0       | 0    |
| <b>Butter</b> [10]                     | 3.0    | 3.0     | 3.0  | 2.3         | 2.3     | 2.3   | 0            | 4       | 2    |
| <b>Camelia</b> [2,17,51]               | 0.0    | 0.0     | 0.0  | 52.2        | 52.2    | 52.2  | 35           | 143     | 89   |
| <b>Canola</b> [2,10,14,21,37,51,66,67] | 0.1    | 3.8     | 2.0  | 43.0        | 268.0   | 155.5 | 327          | 1130    | 729  |
| <b>Chia</b> [3,22-24]                  | 0.0    | 0.0     | 0.0  | 23.8        | 47.6    | 35.7  | 455          | 455     | 455  |
| <b>Coconut</b> [2,10,18,37,68]         | 0.0    | 0.0     | 0.0  | 0.0         | 0.5     | 0.3   | 40           | 120     | 80   |
| <b>Corn</b> [2,3,10,18,37,51,66-69]    | 0.5    | 4.6     | 2.6  | 33.0        | 88.7    | 60.9  | 480          | 2300    | 1390 |
| <b>Cotton</b> [18,27,66,70]            | 0.0    | 0.0     | 0.0  | 38.0        | 120.0   | 79.0  | 270          | 799     | 535  |
| <b>Evening primrose</b> [28-31,71,72]  | 0.0    | 0.0     | 0.0  | 26.3        | 34.1    | 30.2  | 971          | 1302    | 1137 |
| <b>Flaxseed</b> [2,3,10,22,32,51,66]   | 0.0    | 0.1     | 0.1  | 34.7        | 59.4    | 47.1  | 267          | 403     | 335  |
| <b>Grapeseed</b> [10,34-36,51,73]      | 0.0    | 0.0     | 0.0  | 24.0        | 42.4    | 33.2  | 200          | 1107    | 654  |
| <b>Hazelnut</b> [3,37,38,65,74]        | 0.0    | 0.0     | 0.0  | 20.0        | 60.0    | 40.0  | 59           | 263     | 161  |
| <b>Herring</b> [14,39]                 | 0.0    | 0.0     | 0.0  | 0.4         | 8.1     | 4.3   | 0            | 0       | 0    |

\* TFA, trans fatty acids. Values expressed as g/100g for TFA and mg/100g for tocopherols and sterols. For references, see References for Supplementary Tables S1 and S2.

**Supplementary Table S2 (cont.).** Lowest, highest and mean content of the fatty acids included as criteria for the developing of the nutritional quality score of dietary oils.

| Oil                                                  | TFA    |         |      | Tocopherols |         |       | Phytosterols |         |      |
|------------------------------------------------------|--------|---------|------|-------------|---------|-------|--------------|---------|------|
|                                                      | Lowest | Highest | Mean | Lowest      | Highest | Mean  | Lowest       | Highest | Mean |
| <b>Lard</b> [10]                                     | 0.0    | 0.0     | 0.0  | 0.6         | 0.6     | 0.6   | 0            | 0       | 0    |
| <b>Margarine</b> [41-44]                             | 0.1    | 21.7    | 10.9 | 0.0         | 0.0     | 0.0   | 0            | 0       | 0    |
| <b>Olive, common</b> [2,3,10,48,51,66,68]            | 0.0    | 0.5     | 0.3  | 5.5         | 30.0    | 17.8  | 100          | 288     | 194  |
| <b>Olive, pomace</b> [45,47,48]                      | 0.0    | 0.8     | 0.4  | 18.5        | 30.0    | 24.3  | 180          | 300     | 240  |
| <b>Olive, Virgin</b> [10,45,48,49,68]                | 0.0    | 0.1     | 0.1  | 11.0        | 30.0    | 20.5  | 100          | 256     | 178  |
| <b>Palm</b> [3,14,37,51,66,69,75]                    | 0.0    | 0.0     | 0.0  | 15.0        | 150.0   | 82.5  | 36           | 395     | 216  |
| <b>Peanut</b> [3,22,37,50,51,76]                     | 0.1    | 1.2     | 0.7  | 39.9        | 39.9    | 39.9  | 90           | 434     | 262  |
| <b>Sacha-inchi</b> [52,77]                           | 0.0    | 0.0     | 0.0  | 71.1        | 323.3   | 197.2 | 113          | 364     | 239  |
| <b>Safflower</b> [2,10,18,37,53]                     | 0.0    | 0.1     | 0.1  | 24.0        | 73.1    | 48.6  | 162          | 460     | 311  |
| <b>Salmon</b> [54,55]                                | 0.0    | 0.0     | 0.0  | 2.0         | 2.0     | 2.0   | 0            | 0       | 0    |
| <b>Sardine</b> [56,57]                               | 0.0    | 0.0     | 0.0  | 1.6         | 1.6     | 1.6   | 0            | 0       | 0    |
| <b>Sesame</b> [3,18,37,51,78-80]                     | 0.0    | 0.0     | 0.0  | 33.0        | 101.0   | 67.0  | 450          | 1900    | 1175 |
| <b>Soybean</b> [14,22,50,51,67,68,81,82]             | 0.2    | 3.6     | 1.9  | 60.0        | 337.0   | 198.5 | 180          | 900     | 540  |
| <b>Sunflower</b> [1,3,10,18,21,22,37,51,67-69,81,82] | 0.1    | 1.8     | 1.0  | 44.0        | 152.0   | 98.0  | 205          | 500     | 353  |
| <b>Sunflower, high-oleic</b> [10,18,60,61]           | 0.0    | 0.0     | 0.0  | 52.4        | 52.4    | 52.4  | 170          | 520     | 345  |
| <b>Walnut</b> [2,3,51,65]                            | 0.0    | 0.0     | 0.0  | 14.9        | 34.7    | 24.8  | 90           | 283     | 187  |

\* TFA, trans fatty acids. Values expressed as g/100g for TFA and mg/100g for tocopherols and sterols. For references, see References for Supplementary Tables S1 and S2.
