# Supplementary material for: Virgin Olive Oil Ranks First in a New Nutritional Quality Score Due to Its Compositional Profile
Source: MDPI journal article supplement (doi:10.3390/nu15092127), 2023-04-28
Supplement: s1 [file s1]

**Supplementary Table S1.** Lowest, highest and mean content of the fatty acids included as criteria for the developing of the nutritional quality score of dietary oils (g/100g).

| Oil                             | SFA    |         |      | 18:1   |         |      | 18:2   |         |      | 18:3   |         |      | EPA+DHA |         |      |
|---------------------------------|--------|---------|------|--------|---------|------|--------|---------|------|--------|---------|------|---------|---------|------|
|                                 | Lowest | Highest | Mean | Lowest  | Highest | Mean |
| <b>Almond</b> [1-4]             | 5.8    | 9.3     | 7.6  | 67.6   | 67.9    | 67.8 | 6.2    | 37.1    | 21.7 | 0.0    | 0.3     | 0.2  | 0.0     | 0.0     | 0.0  |
| <b>Argan</b> [5-6]              | 15.8   | 23.1    | 19.5 | 43.0   | 49.1    | 46.1 | 27.2   | 39.3    | 33.3 | 0.0    | 0.5     | 0.3  | 0.0     | 0.0     | 0.0  |
| <b>Avocado</b> [3,10-12]        | 11.6   | 31.7    | 21.7 | 58.4   | 76.5    | 67.5 | 9.0    | 17.5    | 13.3 | 0.3    | 3.2     | 1.8  | 0.0     | 0.0     | 0.0  |
| <b>Beef tallow</b> [10,13,14]   | 47.5   | 49.8    | 48.7 | 40.5   | 41.8    | 41.2 | 1.0    | 6.0     | 3.5  | 0.0    | 1.5     | 0.8  | 0.0     | 0.0     | 0.0  |
| <b>Butter</b> [10,15]           | 50.5   | 67.5    | 59.0 | 23.4   | 29.4    | 26.4 | 1.8    | 2.3     | 2.1  | 0.4    | 1.2     | 0.8  | 0.0     | 0.0     | 0.0  |
| <b>Camellia</b> [2,16,17]       | 17.2   | 17.3    | 17.3 | 72.5   | 79.8    | 76.2 | 7.5    | 9.5     | 8.5  | 0.3    | 0.6     | 0.5  | 0.0     | 0.0     | 0.0  |
| <b>Canola</b> [1,2,10,18-21]    | 4.3    | 17.4    | 10.9 | 58.6   | 72.8    | 65.7 | 15.2   | 30.0    | 22.6 | 1.2    | 44.0    | 22.6 | 0.0     | 0.0     | 0.0  |
| <b>Chia</b> [3,22-24]           | 9.3    | 14.0    | 11.7 | 6.0    | 11.0    | 8.5  | 11.7   | 20.4    | 16.1 | 60.2   | 65.2    | 62.7 | 0.0     | 0.0     | 0.0  |
| <b>Coconut</b> [1,10,18-20,25]  | 82.5   | 92.9    | 87.7 | 5.8    | 8.8     | 7.3  | 0.5    | 2.5     | 1.5  | 0.0    | 0.2     | 0.1  | 0.0     | 0.0     | 0.0  |
| <b>Corn</b> [2,3,10,18-20]      | 13.4   | 25.1    | 19.3 | 24.8   | 38.7    | 31.8 | 34.0   | 65.6    | 49.8 | 0.0    | 2.0     | 1.0  | 0.0     | 0.0     | 0.0  |
| <b>Cotton</b> [18-20,26,27]     | 10.5   | 28.2    | 19.4 | 17.5   | 35.4    | 26.5 | 42.0   | 64.3    | 53.2 | 0.0    | 0.4     | 0.2  | 0.0     | 0.0     | 0.0  |
| <b>Evening primrose</b> [28-31] | 8.7    | 13.9    | 11.3 | 7.2    | 11.5    | 9.4  | 61.0   | 73.1    | 67.1 | 8.7    | 12.9    | 10.8 | 0.0     | 0.0     | 0.0  |
| <b>Flaxseed</b> [2,10,20,32-33] | 8.9    | 9.7     | 9.3  | 18.3   | 23.5    | 20.9 | 12.9   | 20.5    | 16.7 | 47.5   | 57.1    | 52.3 | 0.0     | 0.0     | 0.0  |
| <b>Grapeseed</b> [10,12,34-36]  | 9.7    | 12.6    | 11.2 | 14.5   | 22.2    | 18.4 | 58.0   | 78.0    | 68.0 | 0.0    | 1.1     | 0.6  | 0.0     | 0.0     | 0.0  |
| <b>Hazelnut</b> [2,37,38]       | 7.2    | 16.7    | 12.0 | 74.5   | 83.2    | 78.9 | 7.6    | 16.6    | 12.1 | 0.0    | 0.2     | 0.1  | 0.0     | 0.0     | 0.0  |
| <b>Herring</b> [14,39-40]       | 20.0   | 24.1    | 22.1 | 45.6   | 56.4    | 51.0 | 1.1    | 1.3     | 1.2  | 0.2    | 1.5     | 0.9  | 10.7    | 19.7    | 15.2 |

\* EPD+DHA, ecosapentaenoic plus docosahexaenoic acid content; SFA, saturated fatty acids. For references, see References for Supplementary Tables S1 and S2.

**Supplementary Table S1. (cont.).** Lowest, highest and mean content of the fatty acids included as criteria for the developing of the nutritional quality score of dietary oils. (g/100g).

| Oil                                        | SFA    |         |      | 18:1   |         |      | 18:2   |         |      | 18:3   |         |      | EPA+DHA (mg) |         |      |
|--------------------------------------------|--------|---------|------|--------|---------|------|--------|---------|------|--------|---------|------|--------------|---------|------|
|                                            | Lowest | Highest | Mean | Lowest       | Highest | Mean |
| <b>Lard</b> [10,13,14]                     | 38.6   | 39.0    | 38.8 | 44.0   | 44.9    | 44.5 | 4.0    | 12.0    | 8.0  | 0.0    | 1.5     | 0.8  | 0.0          | 0.0     | 0.0  |
| <b>Margarine</b> [41-44]                   | 10.1   | 56.2    | 33.1 | 20.8   | 58.9    | 39.9 | 12.8   | 59.3    | 36.1 | 0.0    | 0.0     | 0.0  | 0.0          | 0.0     | 0.0  |
| <b>Olive, common</b> [1,3,10,19,20,45,46]  | 15.3   | 20.7    | 18.0 | 66.6   | 80.9    | 73.8 | 3.5    | 21.0    | 12.3 | 0.0    | 1.6     | 0.8  | 0.0          | 0.0     | 0.0  |
| <b>Olive, pomace</b> [19,45,47,48]         | 13.5   | 19.1    | 16.3 | 65.0   | 75.4    | 70.2 | 3.5    | 21.0    | 12.3 | 0.6    | 0.8     | 0.7  | 0.0          | 0.0     | 0.0  |
| <b>Olive, Virgin</b> [10,16,45,49]         | 13.0   | 20.2    | 16.6 | 61.2   | 79.4    | 70.3 | 3.5    | 21.0    | 12.3 | 0.3    | 0.8     | 0.6  | 0.0          | 0.0     | 0.0  |
| <b>Palm</b> [1,10,18,25]                   | 46.3   | 49.5    | 47.9 | 37.0   | 41.5    | 39.3 | 9.0    | 12.0    | 10.5 | 0.0    | 0.5     | 0.3  | 0.0          | 0.0     | 0.0  |
| <b>Peanut</b> [1,3,10,19,20,50,51]         | 12.6   | 19.2    | 15.9 | 38.6   | 74.2    | 56.4 | 18.2   | 43.2    | 30.7 | 0.0    | 0.3     | 0.2  | 0.0          | 0.0     | 0.0  |
| <b>Sacha-inchi</b> [46,52]                 | 6.8    | 15.9    | 11.4 | 9.7    | 24.7    | 17.2 | 21.3   | 53.6    | 37.5 | 10.1   | 49.0    | 29.6 | 0.0          | 0.0     | 0.0  |
| <b>Safflower</b> [2,10,18,20,53]           | 7.2    | 9.8     | 8.5  | 11.6   | 16.6    | 14.1 | 54.3   | 83.2    | 68.8 | 0.0    | 0.2     | 0.1  | 0.0          | 0.0     | 0.0  |
| <b>Salmon</b> [54,55]                      | 23.8   | 23.8    | 23.8 | 35.5   | 35.5    | 35.5 | 1.5    | 15.0    | 8.3  | 0.0    | 6.0     | 3.0  | 5.0          | 25.5    | 15.3 |
| <b>Sardine</b> [56,57]                     | 31.9   | 31.9    | 31.9 | 24.4   | 24.4    | 24.4 | 1.6    | 1.8     | 1.7  | 0.4    | 0.8     | 0.6  | 23.1         | 32.7    | 27.9 |
| <b>Sesame</b> [1,18,33,58]                 | 16.9   | 18.6    | 17.8 | 40.6   | 42.0    | 41.3 | 40.1   | 47.9    | 44.0 | 0.2    | 0.8     | 0.5  | 0.0          | 0.0     | 0.0  |
| <b>Soybean</b> [3,10,18-21,25]             | 12.2   | 23.9    | 18.1 | 16.4   | 38.1    | 27.3 | 47.6   | 59.0    | 53.3 | 4.5    | 12.1    | 8.3  | 0.0          | 0.0     | 0.0  |
| <b>Sunflower</b> [1,3,10,18-21,25]         | 8.3    | 12.4    | 10.4 | 15.9   | 45.5    | 30.7 | 46.0   | 76.0    | 61.0 | 0.0    | 0.5     | 0.3  | 0.0          | 0.0     | 0.0  |
| <b>Sunflower, high-oleic</b> [10,18,60-62] | 7.8    | 9.9     | 8.9  | 83.7   | 85.2    | 84.4 | 2.1    | 17.0    | 9.6  | 0.0    | 0.3     | 0.2  | 0.0          | 0.0     | 0.0  |
| <b>Walnut</b> [2,3,63,64]                  | 8.0    | 12.3    | 10.2 | 14.0   | 26.3    | 20.2 | 53.7   | 63.2    | 58.4 | 0.1    | 14.4    | 7.2  | 0.0          | 0.0     | 0.0  |

\* EPD+DHA, ecosapentaenoic plus docosahexaenoic acid content; SFA, saturated fatty acids. For references, see References for Supplementary Tables S1 and S2.
